# Supplementary material for: CLDN3 inhibits cancer aggressiveness via Wnt-EMT signaling and is a potential prognostic biomarker for hepatocellular carcinoma
Source: PubMed Central journal article supplement (PMC4202152; doi:10.18632/oncotarget.2288), 2014-07-31
Supplement: oncotarget-05-7663-s001.pdf [file oncotarget-05-7663-s001.pdf]

## **CLDN3 inhibits cancer aggressiveness via Wnt-EMT signaling and is a potential prognostic biomarker for hepatocellular carcinoma**

### **Supplementary Material**

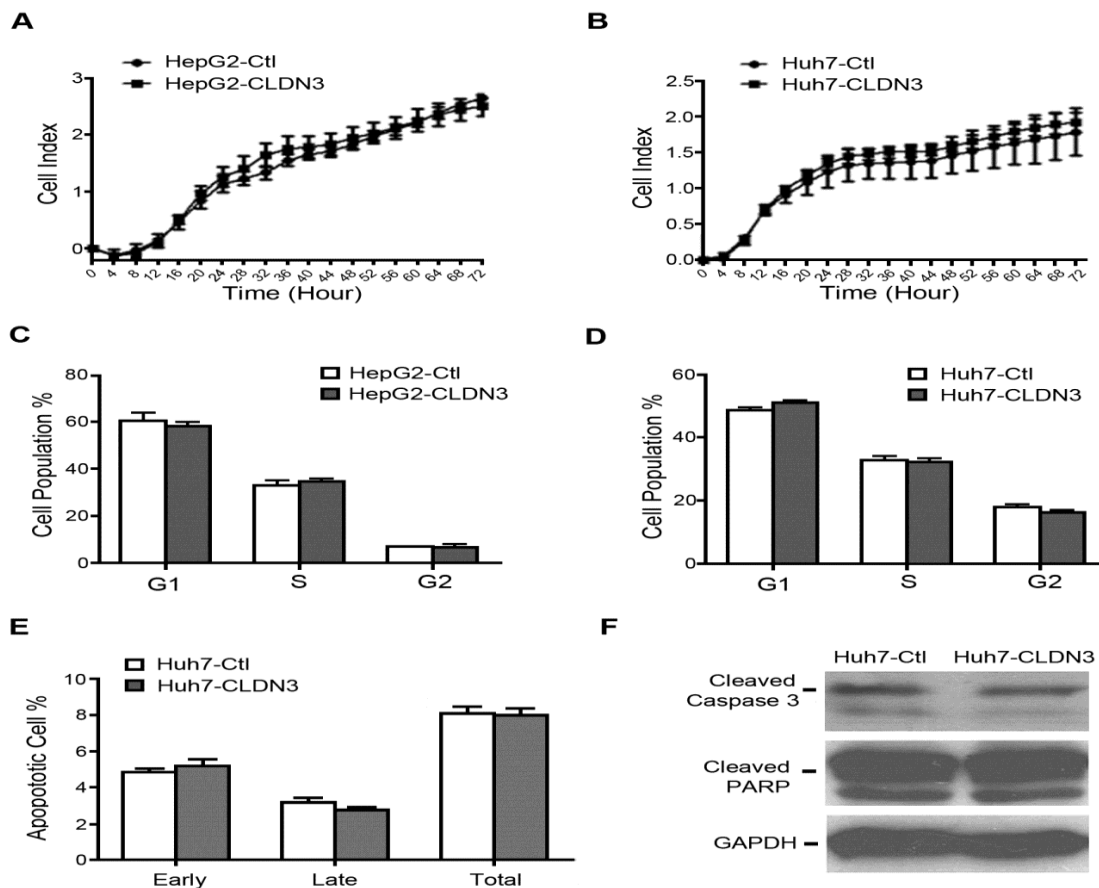

**Fig. S1: *In vitro* functional role of *CLDN3* in HCC cells.** No obvious difference was observed between *CLDN3*- and empty vector-transfected HepG2 and Huh7 cells by cell proliferation (**A**, **B**) and cell cycle (**C**, **D**) analyses. (**E**) Cell apoptosis analyses showed the percentage of apoptotic cells did not change between *CLDN3*- and empty vector-transfected Huh7 cells. (**F**) Expressions of cleaved caspase 3 and cleaved PARP were compared by Western blotting analysis between *CLDN3*- and empty vector-transfected Huh7 cells. GAPDH was used as loading control.

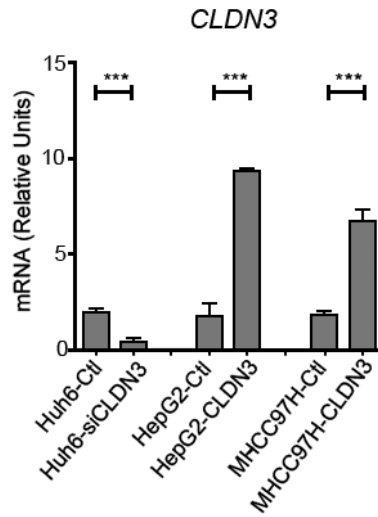

**Fig. S2:** Ectopic expression of *CLDN3* in HCC cell lines (HepG2 and MHCC97H) and knockdown of *CLDN3* in HCC cell line Huh6 were confirmed by qPCR. \*\*\*P<0.001.

**Supplementary Table 1:** Clinicopathological features and *CLDN3* expression in 114 HCC patients

| Case# | CLDN3 <sup>a</sup> | Gender <sup>b</sup> | Age | HBsAg <sup>c</sup> | AFP        | Tumor Size | Cirrhosis <sup>d</sup> | Differ <sup>e</sup> | TNM <sup>f</sup> | Met <sup>g</sup> | Censor <sup>h</sup> | Survival |
|-------|--------------------|---------------------|-----|--------------------|------------|------------|------------------------|---------------------|------------------|------------------|---------------------|----------|
| 1     | 0                  | 2                   | 50  | 2                  | 10,710.00  | 10.00      | 0                      | 3                   | 2                | 0                | 1                   | 96.30    |
| 2     | 1                  | 2                   | 37  | 2                  | 17,631.00  | 9.20       | 0                      | 3                   | 1                | 0                | 1                   | 91.10    |
| 3     | 0                  | 2                   | 28  | 2                  | 402.10     | 3.50       | 0                      | 1                   | 1                | 1                | 2                   | 78.10    |
| 4     | 1                  | 2                   | 30  | 2                  | 10.32      | 6.00       | 0                      | 2                   | 1                | 1                | 1                   | 11.50    |
| 5     | 1                  | 2                   | 47  | 2                  | 2,528.00   | 6.00       | 0                      | 1                   | 1                | 1                | 1                   | 83.60    |
| 6     | 0                  | 2                   | 66  | 1                  | 14.73      | 3.50       | 0                      | 2                   | 1                | 0                | 1                   | 84.50    |
| 7     | 1                  | 1                   | 45  | 2                  | 2.36       | 19.00      | 0                      | 3                   | 1                | 0                | 1                   | 30.40    |
| 8     | 0                  | 2                   | 52  | 2                  | 2.44       | 17.00      | 1                      | 2                   | 2                | 0                | 1                   | 48.10    |
| 9     | 0                  | 2                   | 59  | 2                  | 1,966.00   | 9.00       | 0                      | 3                   | 1                | 0                | 1                   | 32.20    |
| 10    | 0                  | 2                   | 35  | 2                  | 16.07      | 5.50       | 0                      | 1                   | 2                | 0                | 1                   | 54.00    |
| 11    | 0                  | 2                   | 58  | 2                  | 21.54      | 4.50       | 1                      | 1                   | 1                | 0                | 2                   | 35.00    |
| 12    | 0                  | 2                   | 37  | 2                  | 184.70     | 5.10       | 0                      | 2                   | 1                | 1                | 1                   | 57.20    |
| 13    | 1                  | 2                   | 67  | 2                  | 7.98       | 10.00      | 0                      | -                   | 1                | 1                | 1                   | 78.30    |
| 14    | 0                  | 1                   | 52  | 2                  | 414.10     | 3.00       | 0                      | 3                   | 1                | 0                | 1                   | 46.60    |
| 15    | 0                  | 2                   | 39  | 2                  | 4,769.00   | 3.50       | -                      | 3                   | 1                | 0                | 1                   | 72.70    |
| 16    | 1                  | 2                   | 46  | 2                  | 1,565.00   | 12.00      | 0                      | 2                   | 1                | 1                | 2                   | 66.20    |
| 17    | 0                  | 2                   | 43  | 2                  | 392.50     | 9.00       | 1                      | 3                   | 1                | 0                | 1                   | 57.40    |
| 18    | 0                  | 2                   | 70  | 2                  | 36.73      | 5.00       | 1                      | 3                   | 2                | 1                | 1                   | 9.00     |
| 19    | 1                  | 2                   | 33  | 2                  | 43.38      | 9.00       | 0                      | 1                   | 2                | 1                | 1                   | 8.20     |
| 20    | 0                  | 1                   | 52  | 2                  | 25,150.00  | 8.00       | 0                      | 3                   | 1                | 1                | 1                   | 6.20     |
| 21    | 0                  | 2                   | 58  | 2                  | 504.50     | 3.50       | 1                      | 3                   | 1                | 0                | 1                   | 75.60    |
| 22    | 1                  | 2                   | 38  | 2                  | 2,416.00   | 4.00       | 0                      | 2                   | 1                | 0                | 1                   | 75.90    |
| 23    | 1                  | 2                   | 55  | 2                  | 310.20     | 2.50       | 0                      | 2                   | 1                | 1                | 1                   | 59.90    |
| 24    | 1                  | 2                   | 40  | 2                  | 4.21       | 6.00       | 0                      | 1                   | 1                | 1                | 1                   | 73.40    |
| 25    | 1                  | 2                   | 45  | 2                  | 2,440.00   | 12.00      | 0                      | 3                   | 2                | 1                | 1                   | 49.60    |
| 26    | 0                  | 2                   | 65  | 2                  | -          | 10.00      | 0                      | 1                   | 1                | 0                | 1                   | 52.10    |
| 27    | 0                  | 2                   | 65  | 2                  | 340.40     | 4.00       | 0                      | 3                   | 1                | 0                | 2                   | 14.00    |
| 28    | 0                  | 2                   | 42  | 2                  | 19,618.00  | 3.50       | 1                      | 2                   | 1                | 1                | 2                   | 20.40    |
| 29    | 0                  | 2                   | 50  | -                  | -          | 6.00       | 0                      | -                   | 2                | 0                | 2                   | 6.00     |
| 30    | 0                  | 1                   | 39  | 1                  | 1.91       | 6.50       | 0                      | 3                   | 1                | 0                | 2                   | 40.80    |
| 31    | 0                  | 2                   | 55  | 2                  | 37.20      | 12.00      | 0                      | 3                   | 1                | 1                | 2                   | 16.60    |
| 32    | 0                  | 2                   | 54  | 2                  | 214.30     | 5.00       | 1                      | 3                   | 1                | 1                | 1                   | 41.00    |
| 33    | 0                  | 1                   | 31  | 2                  | 7,162.00   | 7.00       | 1                      | 1                   | 1                | 1                | 2                   | 7.80     |
| 34    | 0                  | 2                   | 52  | 2                  | 121,000.00 | 12.00      | 0                      | 3                   | 1                | 1                | 2                   | 3.30     |

|    |   |   |    |   |            |       |   |   |   |   |   |       |
|----|---|---|----|---|------------|-------|---|---|---|---|---|-------|
| 35 | 0 | 1 | 39 | 2 | 5,449.80   | 4.50  | 1 | 3 | 2 | 1 | 2 | 12.30 |
| 36 | 1 | 1 | 63 | 2 | 20,394.00  | 5.00  | 1 | 2 | 1 | 1 | 1 | 43.80 |
| 37 | 0 | 2 | 52 | 2 | 5.04       | 3.50  | 0 | 3 | 1 | 0 | 2 | 2.40  |
| 38 | 0 | 2 | 47 | 2 | 837.10     | 3.00  | 0 | 3 | 1 | 1 | 2 | 25.90 |
| 39 | 0 | 2 | 52 | 2 | 43.30      | 3.00  | 1 | 2 | 1 | 1 | 1 | 40.70 |
| 40 | 1 | 2 | 50 | 2 | 6.12       | 4.50  | 0 | 3 | 2 | 0 | 1 | 31.90 |
| 41 | 0 | 2 | 43 | 2 | 19,582.00  | 5.00  | 0 | 3 | 1 | 1 | 2 | 16.40 |
| 42 | 0 | 2 | 54 | 2 | 104,826.00 | 14.00 | 0 | 2 | 2 | 1 | 2 | 5.00  |
| 43 | 0 | 2 | 58 | 2 | 361.20     | 2.00  | 1 | 2 | 1 | 1 | 2 | 35.00 |
| 44 | 0 | 2 | 62 | 2 | 3.30       | 8.00  | 0 | 1 | 1 | 1 | 2 | 40.20 |
| 45 | 0 | 2 | 55 | 2 | 50,979.00  | 7.00  | 0 | 2 | 1 | 1 | 2 | 51.50 |
| 46 | 0 | 2 | 17 | 2 | 3,177.00   | 3.70  | 0 | 3 | 2 | 0 | 2 | 3.80  |
| 47 | 0 | 1 | 47 | 2 | 34.02      | 11.00 | 1 | 3 | 2 | 1 | 2 | 6.30  |
| 48 | 0 | 2 | 31 | 2 | 121,000.00 | 11.00 | 0 | 3 | 1 | 0 | 1 | 23.10 |
| 49 | 1 | 2 | 50 | 2 | 2.04       | 6.00  | 0 | 2 | 1 | 1 | 1 | 59.80 |
| 50 | 0 | 2 | 49 | 2 | 4.17       | 12.00 | 1 | - | 1 | 0 | 1 | 28.40 |
| 51 | 1 | 2 | 50 | 2 | 76.85      | 9.00  | 1 | 3 | 2 | 1 | 2 | 33.00 |
| 52 | 1 | 1 | 33 | 1 | 14,629.00  | 6.50  | 0 | 3 | 2 | 1 | 2 | 6.50  |
| 53 | 0 | 2 | 32 | 2 | 105.10     | 8.00  | 1 | 2 | 1 | 1 | 1 | 16.80 |
| 54 | 0 | 2 | 43 | 2 | 24,250.00  | 17.00 | 0 | 3 | 1 | 1 | 1 | 23.10 |
| 55 | 0 | 2 | 41 | 2 | 167.80     | 5.00  | 1 | 3 | 1 | 1 | 2 | 32.10 |
| 56 | 1 | 2 | 55 | 2 | 83.42      | 4.00  | 0 | 3 | 1 | 1 | 1 | 35.30 |
| 57 | 0 | 2 | 43 | 2 | 231.70     | 8.00  | 0 | 3 | 1 | 1 | 2 | 11.20 |
| 58 | 0 | 1 | 53 | 1 | 39.68      | 8.50  | 0 | 3 | 2 | 0 | - | -     |
| 59 | 0 | 2 | 58 | 1 | 3.99       | 12.00 | 0 | 1 | 1 | 0 | 1 | 32.90 |
| 60 | 0 | 2 | 60 | 2 | 6.35       | 5.00  | 1 | 2 | 1 | 0 | 1 | 14.70 |
| 61 | 0 | 2 | 52 | 2 | 478.50     | 6.00  | 0 | 2 | 2 | 0 | 1 | 36.80 |
| 62 | 0 | 2 | 30 | 2 | 3,904.00   | 3.00  | 0 | 3 | 1 | 1 | 1 | 3.30  |
| 63 | 0 | 1 | 60 | 1 | 2,324.00   | 7.00  | 0 | 3 | 2 | 1 | 1 | 6.80  |
| 64 | 1 | 1 | 29 | 2 | 5,414.00   | 2.50  | 0 | 3 | 1 | 0 | 1 | 31.20 |
| 65 | 0 | 2 | 39 | 2 | 6,535.00   | 10.00 | 1 | 2 | 1 | 1 | 1 | 5.10  |
| 66 | 1 | 2 | 70 | 2 | 121,000.00 | 12.00 | 1 | 3 | 1 | 0 | 2 | 2.10  |
| 67 | 0 | 2 | 58 | 2 | 11.42      | 9.00  | 0 | 2 | 1 | 0 | 1 | 24.90 |
| 68 | 0 | 2 | 52 | 2 | 5.42       | 6.50  | 0 | 2 | 1 | 1 | 2 | 18.20 |
| 69 | 0 | 1 | 47 | 2 | 8,406.00   | 10.00 | 0 | 2 | 1 | 0 | 1 | 36.90 |
| 70 | 0 | 1 | 43 | 1 | 0.95       | 15.00 | 0 | 1 | 1 | 0 | 1 | 34.30 |
| 71 | 0 | 2 | 63 | 2 | 7,301.00   | 12.00 | 0 | 3 | 2 | 1 | 2 | 9.80  |
| 72 | 1 | 2 | 52 | 2 | 2.06       | 12.00 | 0 | 2 | 1 | 0 | 1 | 52.00 |

|     |   |   |    |   |            |       |   |   |   |   |   |       |
|-----|---|---|----|---|------------|-------|---|---|---|---|---|-------|
| 73  | 0 | 2 | 35 | 2 | 87.47      | 9.00  | 1 | 1 | 1 | 1 | 2 | 39.60 |
| 74  | 0 | 2 | 48 | 2 | 15.60      | 5.00  | 0 | 2 | 2 | 1 | 1 | 20.20 |
| 75  | 0 | 2 | 58 | 2 | 4.31       | 2.50  | 0 | 2 | 1 | 1 | 1 | 50.80 |
| 76  | 0 | 2 | 38 | - | -          | -     | - | - | - | 0 | - | -     |
| 77  | 0 | 2 | 37 | 2 | 4.22       | 7.00  | 0 | 1 | 1 | 0 | 1 | 50.40 |
| 78  | 0 | 2 | 36 | 1 | 240.40     | 4.00  | 0 | 2 | 1 | 0 | 1 | 50.30 |
| 79  | 1 | 2 | 35 | 2 | 1,981.00   | 5.00  | 1 | 2 | 1 | 0 | 1 | 35.20 |
| 80  | 0 | 1 | 33 | 2 | 47,205.00  | 8.50  | - | 2 | 1 | 0 | 1 | 47.20 |
| 81  | 0 | 2 | 59 | 2 | 3,679.00   | 5.00  | 0 | 2 | 1 | 1 | 1 | 18.60 |
| 82  | 0 | 1 | 31 | 2 | 6.11       | 7.50  | 0 | 2 | 1 | 1 | 1 | 48.80 |
| 83  | 1 | 2 | 32 | 2 | 39.67      | 12.00 | 0 | 3 | 1 | 0 | 1 | 47.30 |
| 84  | 0 | 2 | 31 | 2 | 302.70     | 6.00  | 0 | 3 | 1 | 1 | 1 | 20.60 |
| 85  | 0 | 2 | 51 | 2 | 440.00     | 9.50  | 0 | 3 | 1 | 1 | 1 | 46.00 |
| 86  | 0 | 2 | 67 | 2 | 2.06       | 3.00  | 0 | 1 | 1 | 0 | 1 | 45.70 |
| 87  | 1 | 2 | 45 | 2 | 75.40      | 12.00 | 1 | 2 | 2 | 1 | 1 | 46.70 |
| 88  | 0 | 2 | 64 | 2 | 8.95       | 2.60  | 1 | 2 | 1 | 0 | 1 | 43.80 |
| 89  | 1 | 2 | 45 | 2 | 11.59      | 5.00  | 1 | 2 | 1 | 1 | 1 | 43.80 |
| 90  | 0 | 1 | 54 | 2 | 1,806.00   | 5.00  | 0 | 2 | 1 | 0 | 1 | 25.10 |
| 91  | 0 | 2 | 46 | 2 | 483.10     | 2.50  | 0 | 1 | 1 | 0 | 1 | 43.00 |
| 92  | 0 | 2 | 50 | 2 | 5.72       | 8.00  | 0 | 3 | 1 | 0 | 1 | 29.30 |
| 93  | 1 | 2 | 57 | 2 | 26.38      | 2.00  | 1 | 2 | 1 | 1 | 1 | 44.80 |
| 94  | 0 | 2 | 60 | 1 | 1.66       | 4.50  | 0 | 2 | 1 | 0 | 1 | 44.80 |
| 95  | 0 | 2 | 53 | 2 | 10,677.00  | 4.50  | 1 | 2 | 1 | 1 | 1 | 44.60 |
| 96  | 0 | 2 | 34 | - | -          | -     | - | - | - | - | 2 | -     |
| 97  | 0 | 1 | 46 | 1 | 7.02       | 6.00  | 0 | 3 | - | - | 2 | 8.07  |
| 98  | 0 | 2 | 32 | 2 | -          | 1.30  | 1 | 2 | - | 1 | 2 | 14.87 |
| 99  | 1 | 2 | 56 | 1 | 29.16      | 9.50  | 0 | 3 | - | 0 | 1 | 41.67 |
| 100 | 0 | 2 | 66 | 1 | 2.52       | 9.00  | 0 | - | - | - | - | -     |
| 101 | 0 | 1 | 21 | 1 | 7,034.00   | 5.00  | 0 | 3 | - | 1 | 2 | 19.13 |
| 102 | 0 | 2 | 58 | 1 | 6,846.00   | 4.50  | 0 | 2 | - | 0 | 1 | 39.90 |
| 103 | 0 | 2 | 53 | - | -          | -     | - | - | - | 0 | 1 | -     |
| 104 | 0 | 2 | 67 | 1 | 849.00     | 13.00 | 0 | 3 | - | 0 | 1 | 32.27 |
| 105 | 0 | 1 | 68 | 2 | 2,374.00   | 5.00  | 0 | 3 | - | 0 | 1 | 31.63 |
| 106 | 0 | 2 | 74 | 2 | 630.30     | 4.00  | 1 | 2 | - | 0 | 1 | 39.00 |
| 107 | 1 | 2 | 43 | - | 121,000.00 | 14.00 | 1 | 3 | - | 0 | 1 | 38.00 |
| 108 | 0 | 2 | 39 | 2 | 3.24       | 2.00  | 1 | 2 | - | 0 | 1 | 18.67 |
| 109 | 0 | 2 | 72 | 1 | 5.61       | 5.50  | 0 | 2 | - | 0 | 1 | 34.80 |
| 110 | 0 | 2 | 47 | 1 | 3,515.00   | 5.00  | 1 | 2 | - | 0 | 1 | 31.47 |

|     |   |   |    |   |          |       |   |   |   |   |   |       |
|-----|---|---|----|---|----------|-------|---|---|---|---|---|-------|
| 111 | 0 | 1 | 21 | 2 | 8,250.00 | 12.00 | 0 | 2 | - | 1 | 1 | 5.47  |
| 112 | 0 | 2 | 36 | 1 | 0.96     | 3.50  | 0 | 2 | - | 0 | 1 | 10.30 |
| 113 | 0 | 2 | 70 | - | -        | -     | - | - | - | 0 | 2 | 6.27  |
| 114 | 0 | 2 | 36 | 2 | 8.06     | 3.00  | 0 | 2 | - | 0 | 1 | 33.90 |

<sup>a</sup>CLDN3 expression detected by qPCR: 0=down-regulation, 1=normal expression;

<sup>b</sup>Gender: 1=female, 2=male;

<sup>c</sup>HBsAg: 1=negative, 2=positive;

<sup>d</sup>Cirrhosis: 0=absent, 1=present;

<sup>e</sup>Differentiation: 1=well differentiated, 2=moderately differentiated, 3=poorly differentiated;

<sup>f</sup>TNM stage: 1=I-II stage, 2=III-IV stage;

<sup>g</sup>Recurrence or metastasis: 0=absent, 1=present;

<sup>h</sup>Censor: 2=dead at the end of the follow-up, 1=still alive at the end of the follow-up.

**Supplementary Table 2:** List of PCR primers for expression, methylation, and bisulfite sequencing analyses.

| <b>Primers</b>            | <b>Sequence (5'-3')</b>     | <b>Product Length (bp)</b> |
|---------------------------|-----------------------------|----------------------------|
| <b><i>RT-PCR</i></b>      |                             |                            |
| CLDN3-F                   | CAACACCATTATCCGGGACT        | 168                        |
| CLDN3-R                   | TTGGTGGCCGTGTACTTCTT        |                            |
| ACTB-F                    | GTCTTCCCCTCCATCGTG          | 113                        |
| ACTB-R                    | AGGGTGAGGATGCCTCTCTT        |                            |
| <b><i>MSP</i></b>         |                             |                            |
| CLDN3 MSP <sub>m</sub> -F | TTCGAGTAGAGAGGGATAAGGATC    | 171                        |
| CLDN3 MSP <sub>m</sub> -R | CTCCAAAACCTAAAAACAATAACGTA  |                            |
| CLDN3 MSP <sub>u</sub> -F | TTTTGAGTAGAGAGGGATAAGGATT   | 172                        |
| CLDN3 MSP <sub>u</sub> -R | CTCCAAAACCTAAAAACAATAACATA  |                            |
| <b><i>BGS</i></b>         |                             |                            |
| CLDN3BGS-F                | GAGTAGAGAGGGATAAGGAT        | 290                        |
| CLDN3 BGS-R               | CCTACACCTACCTATAACTTTATAAAC |                            |
